# Supplementary material for: Single-step fabrication of large-scale patterned honeycomb structures via self-assembly of a small organic molecule
Source: Royal Society of Chemistry journal article supplement (doi:10.1039/c5ra09016d), 2015-01-01
Supplement: c5ra09016d1.pdf [file c5ra09016d1.pdf]

## Supporting Information

### Single-Step Fabrication of Large-Scale Patterned Honeycomb Structures via Self-Assembly of a Small Organic Molecule

Xia Ran<sup>1</sup>, Kun Zhang<sup>1</sup>, Lili Shi<sup>1</sup>, Zhen Chi<sup>1</sup>, Weihong Qiu<sup>2,\*</sup> and Lijun Guo<sup>1,\*</sup>

<sup>1</sup>*Institute of Photobiophysics, School of Physics and Electronics, Henan University, Kaifeng 475004, People's Republic of China*

<sup>2</sup>*Department of Physics, Oregon State University, Corvallis, OR 97331, USA*

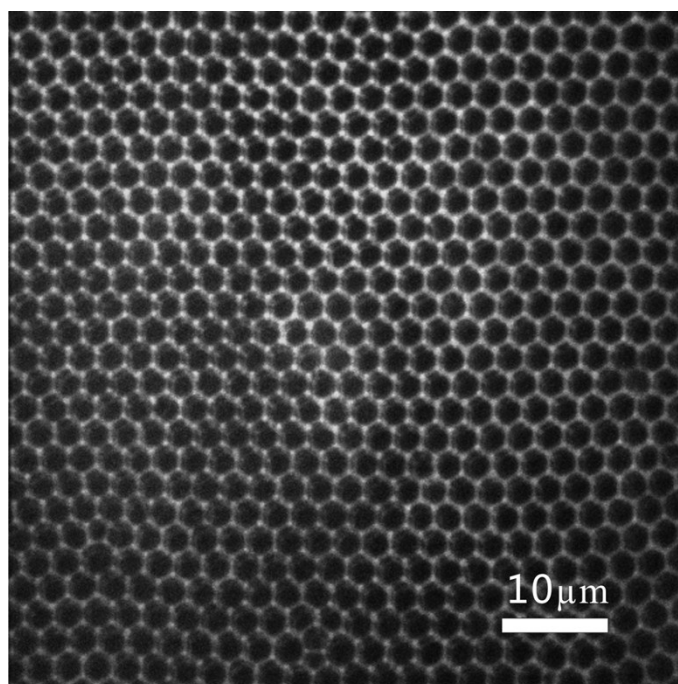

**Figure S1** A representative optical micrograph of the drop-cast film derived from AOB-t8 ( $1 \times 10^{-3}$  M) in dichloromethane (DCE) on the glass plate at room temperature.

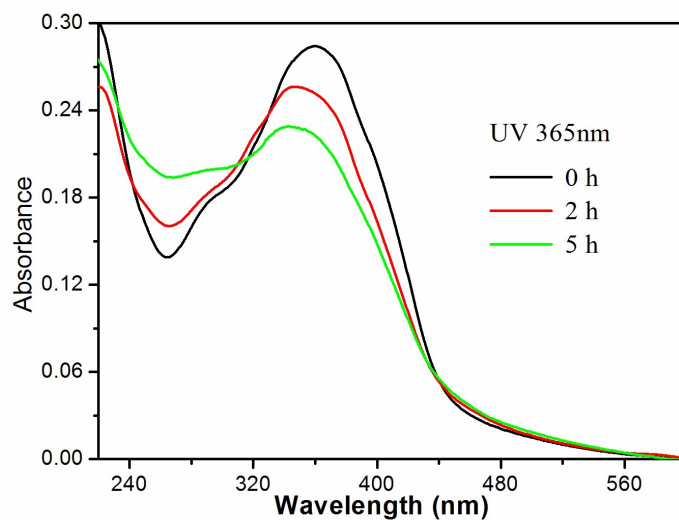

**Figure S2** UV-Vis absorption spectra of AOB-t8 drop-casting film before and after 365 nm irradiation for 5 hours at room temperature.

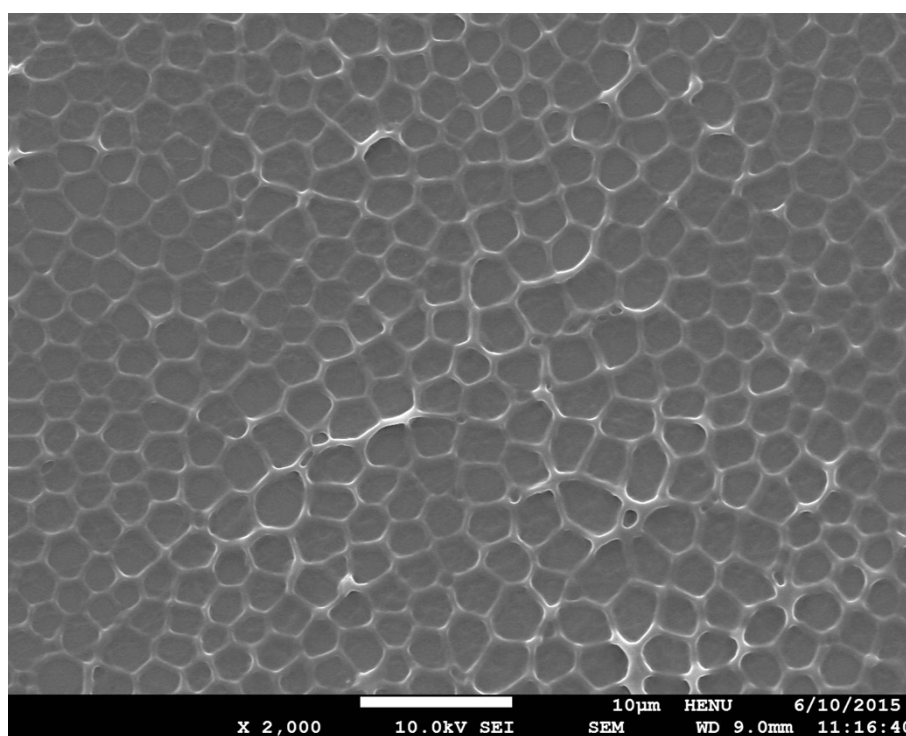

**Figure S3** SEM images of AOB-t8 drop-casting film after 365 nm irradiation for 5 hours at room temperature.

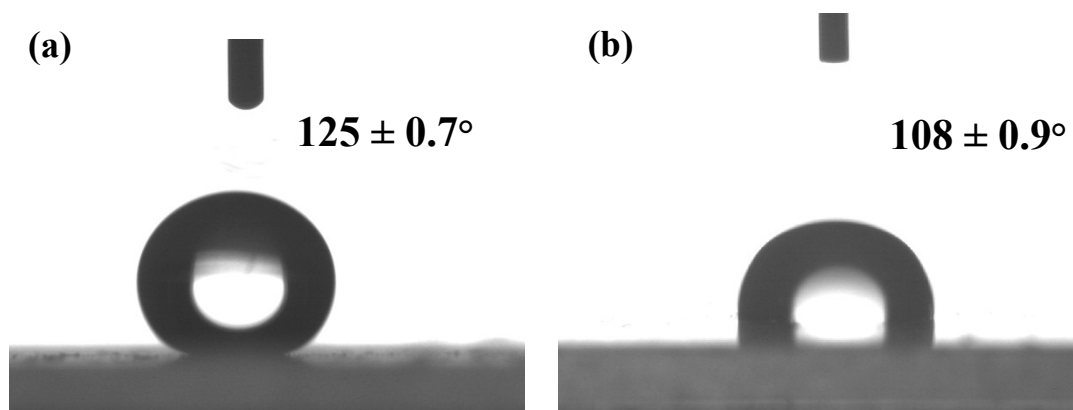

**Figure S4** Photographs of the water droplet on the honeycomb-patterned films formed by  $1 \times 10^{-3}$  M AOB-t8 in DCE on (a) glass and (b) PVC sheet.

### **Experimental Section**

Photo-irradiation experiment was carried out with a 250 W super pressure Hg lamp through a lightguide and an appropriate color filter ( $320 < \lambda < 390$  nm for UV light). The intensity of the UV was ca.  $7500 \text{ mW cm}^{-2}$  at the tip of the lightguide. Contact angle (CA) measurements were performed using the sessile drop method (Dataphysics, OCA 20), in which the water droplets were introduced using a microsyringe, and images were captured to measure the angle of the liquid-solid interface. Each sample was recorded at five different points.
